# Supplementary material for: Oral microbiota reveals signs of acculturation in Mexican American women
Source: PubMed Central journal article supplement (PMC5918619; doi:10.1371/journal.pone.0194100), 2018-04-25
Supplement: pone.0194100.s001.pdf [file pone.0194100.s001.pdf]

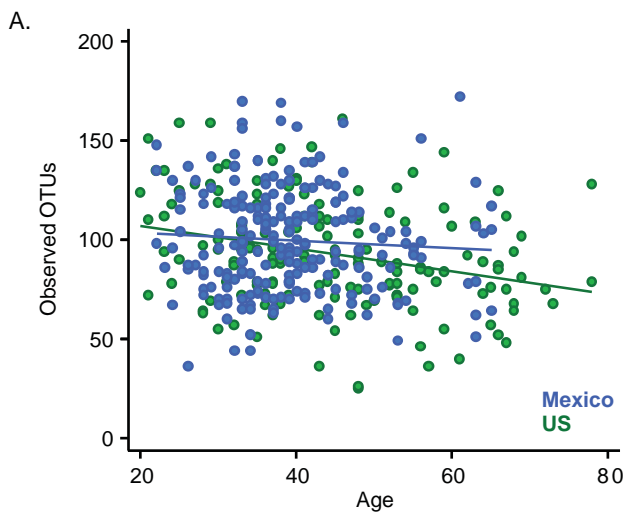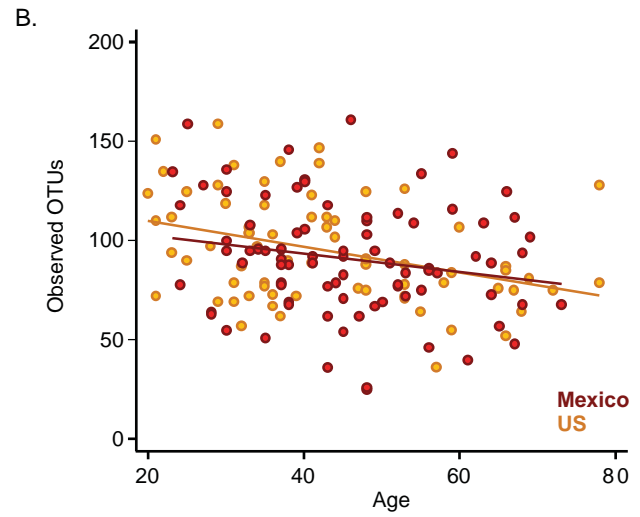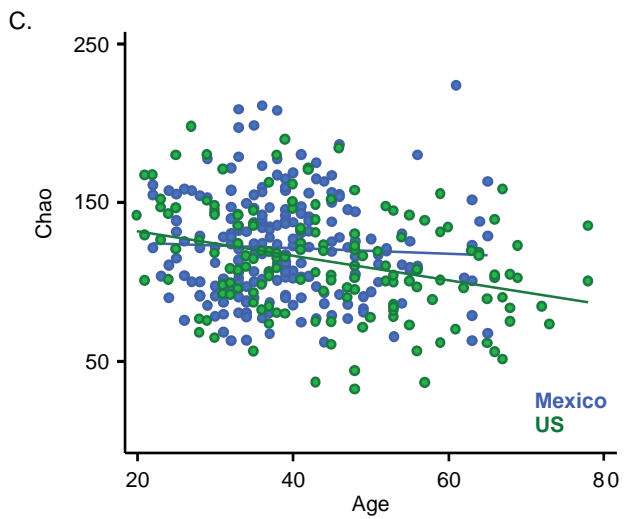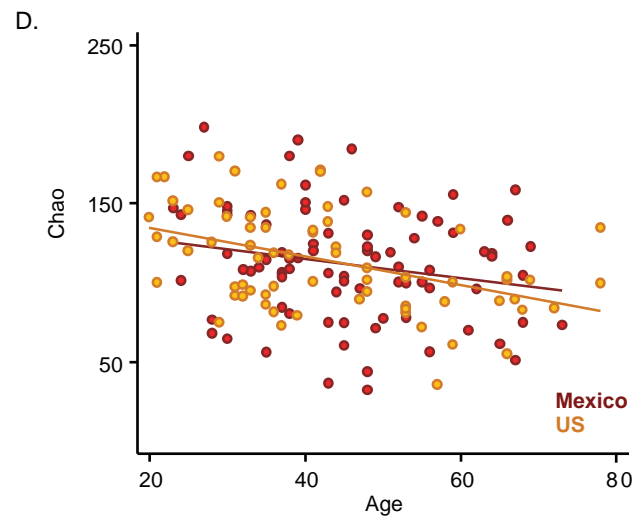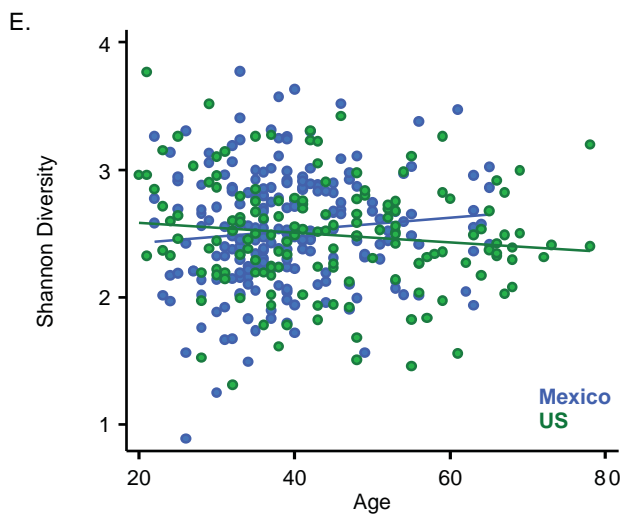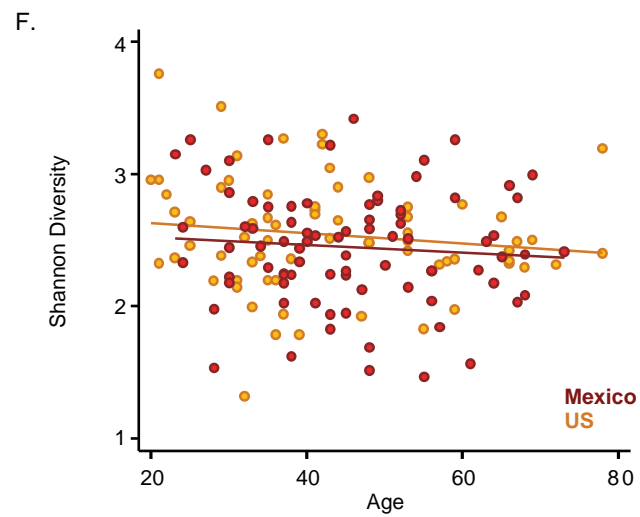

S1 Fig
