# Supplementary material for: Oral microbiota reveals signs of acculturation in Mexican American women
Source: PLoS One. 2018 Apr 25;13(4):e0194100. doi: 10.1371/journal.pone.0194100 (PMC5918619; doi:10.1371/journal.pone.0194100)
Supplement: S1 File — (XLSX) [file pone.0194100.s007.xlsx]

## Sheet: metadata
SubjectID	Age	Married	School	Country_born	Country_long_residence	Age_arrival	Yrs_US	Accult_score	Farmwork	Alcohol	Food	BMI	TotalMETs	Obs_OTU	Chao1	Shannon	DMM
Subject_1	50	Yes	High school	Mexico	Mexico	38	12	1.5	Yes	No		29.37	36.3	70	94	2.74	Prevotella
Subject_2	44	Yes	> High school	USA	USA			4	No	No		32.77	16.5	110	123.2	2.9	Fusobacterium
Subject_3	42	No	> High school	USA	USA			3.75	No	No		35.15	0	147	171.8	3.3	Fusobacterium
Subject_4	33	Yes	High school	Mexico	Mexico	18	15	2.25	No	Yes		22.65	48.3	84	105.9	2.4	Streptococcus
Subject_5	53	No	> High school	USA	USA				Yes	No		25.36	36.3	78	85.9	2.75	Streptococcus
Subject_6	73	No	> High school	Mexico	USA	43	30	3.5	No	No		31.24	3.3	68	73.1	2.41	Streptococcus
Subject_7	65	No	High school	USA	USA			3.5	No	No		27.36	16.5	76	89	2.68	Streptococcus
Subject_8	42	No	High school	USA	USA			3.75	No	No		20.8	9.9	139	170.5	3.23	Fusobacterium
Subject_9	41	Yes		USA	USA			4	No	No		35.42	16.5	123	132.5	2.76	Fusobacterium
Subject_10	32	Yes	> High school	Mexico	Mexico	17	15	2	No	No		28.45	32.5	44	63.1	1.67	Streptococcus
Subject_11	56	Yes	< High school	Mexico	USA	24	32	1.75	No	No		24.07	9.9	86	96.5	2.03	Streptococcus
Subject_12	53	Yes	< High school	Mexico	Mexico	30	23	2.25	Yes	No		31.07	0	68	85.5	2.67	Streptococcus
Subject_13	33	Yes	< High school	Mexico	Mexico	20	13	1.75	Yes	No		33.15	28	170	197.4	3.77	Fusobacterium
Subject_14	63	Yes	< High school	Mexico	Mexico	57	6	1	Yes	No		38.86	36.3	51	63	2.68	Prevotella
Subject_15	25	Yes	High school	Mexico	USA	7	18	2.75	No	No		34.56	9.9	159	179.6	3.26	Fusobacterium
Subject_16	66	Yes	High school	Mexico	USA	23	43	2	Yes	No		35.42	9.9	125	139.3	2.91	Prevotella
Subject_17	59	No	< High school	USA	USA			3.25	Yes	No		29.86	9.9	84	101.1	2.36	Prevotella
Subject_18	53	No	< High school	USA	USA			4	Yes	Yes		36.12	28	71	84.1	2.42	Streptococcus
Subject_19	42	Yes	> High school	Mexico	Mexico	23	19	2.75	No	No		20.25	36.3	90	103.6	2.89	Prevotella
Subject_20	46	No	> High school	Mexico	USA	16	30	3.5	No	Yes		21.94	16.5	161	184.4	3.41	Fusobacterium
Subject_21	33	Yes	< High school	Mexico	Mexico	27	6	3.75	No	No		33.2	16.5	99	134.1	2.19	Streptococcus
Subject_22	43	Yes	High school	Mexico	Mexico	26	17	1.75	No	Yes		33.45	0	90	97	2.88	Prevotella
Subject_23	64	No	> High school	Mexico	Mexico	49	15	1.5	No	No		23.97	28	103	138.1	2.57	Prevotella
Subject_24	56	No	< High school	Mexico	USA	26	30	1.5	No	No		33.29	36.3	85	108	2.27	Streptococcus
Subject_25	46	Yes	> High school	Mexico	Mexico	40	6	2.75	No	No		21.79	28	159	186.6	3.52	Prevotella
Subject_26	61	Yes	< High school	Mexico	Mexico	57	4	1.5	No	No		20.25	36.3	172	224	3.47	Fusobacterium
Subject_27	36	Yes	< High school	Mexico	Mexico	19	17	1.5	No	No		33.83	6.6	118	133.8	2.8	Fusobacterium
Subject_28	65	No	< High school	Mexico	Mexico	39	26	1.25	Yes	No		27.49	6.6	117	163.4	3.02	Prevotella
Subject_29	67	Yes	< High school	Mexico	USA	32	35	2.25	No	No		25.69	16.5	48	51	2.03	Streptococcus
Subject_30	48	Yes	High school	USA	USA			4	No	Yes		30.86	6.6	75	95	2.48	Prevotella
Subject_31	55	Yes	< High school	Mexico	USA	28	27	1	No	No		24.18	94.6	134	141.9	3.1	Fusobacterium
Subject_32	51	No	< High school	Mexico	USA	21	30	1.5	No	No		29.81	28	89	119	2.53	Prevotella
Subject_33	54	Yes	< High school	Mexico	USA	25	29	1	No	No		27.25	28	109	128	2.98	Prevotella
Subject_34	38	No	> High school	Mexico	Mexico	32	6	2.5	No	No		22.96	0	128	167.5	2.78	Fusobacterium
Subject_35	35		< High school	Mexico	Mexico	31	4	1.25	Yes	No		30.89	16.5	140	198.7	2.78	Fusobacterium
Subject_36	23	No	< High school	USA	USA			3.25	No	No		26.25	36.3	94	152.1	2.37	Streptococcus
Subject_37	51	Yes	< High school	Mexico	Mexico	26	25	1.25	No	Yes	Mostly Mexican	58.57	6.6	92	117.3	2.62	Streptococcus
Subject_38	55	Yes	< High school	Mexico	Mexico	50	5	1.25	No	No	Mix	25.4	28	92	109.1	3.03	Prevotella
Subject_39	48	No	High school	USA	USA			4	No	Yes	Mix	23.56	50.5	125	157.5	2.97	Fusobacterium
Subject_40	34	Yes	< High school	Mexico	Mexico	28	6	2	Yes	Yes	Only Mexican	31.28	97.9	65	80.3	2.24	Streptococcus
Subject_41	41	Yes	< High school	Mexico	Mexico	39	2	1	No	No	Mix	36.58	9.9	112	122	2.53	Fusobacterium
Subject_42	30	No	< High school	USA	USA			2.75	No	No	Mix	42.55	48.3	119	142.2	2.95	Fusobacterium
Subject_43	65	No	< High school	Mexico	USA	22	43	1.5	No	No	Mix	24.97	3.3	57	61.2	2.37	Streptococcus
Subject_44	25	Yes	< High school	USA	USA			4	No	Yes	Only Mexican	31.37	20.5	90	120.7	2.64	Streptococcus
Subject_45	69	No	< High school	Mexico	USA	52	17	1.25	No	No	Mostly Mexican	37.6	36.3	102	123	2.99	Prevotella
Subject_46	26	Yes	> High school	Mexico	Mexico	16	10	2.5	No	No	Mix	24.09	9.3	85	104.1	1.56	Streptococcus
Subject_47	78	No	High school	USA	USA			3	No	No	Mix	24.66	6.6	79	100.4	2.4	Prevotella
Subject_48	68	No	< High school	Mexico	USA	28	40	1.75	No	No	Only Mexican	28.46	48	94	104.5	2.39	Prevotella
Subject_49	48	Yes	< High school	USA	USA			3.5	Yes	Yes	Mix	31.9	36.3	88	102.3	2.48	Streptococcus
Subject_50	44	No	> High school	USA	USA			3.5	No	Yes	Mix	31.24	36.3	102	119.3	2.65	Fusobacterium
Subject_51	41	Yes	< High school	USA	USA			3.25	No	No	Mix	34.45	9.9	112	133.7	2.69	Fusobacterium
Subject_52	55	No	> High school	Mexico	Mexico	32	23	2	Yes	No	Mostly Mexican	30.21	36.3	93	107.3	2.48	Streptococcus
Subject_53	29	Yes	> High school	Mexico	Mexico	25	4	2.25	No	No	Mix	29.27	56.3	126	153.3	3.06	Fusobacterium
Subject_54	37	Yes	> High school	Mexico	Mexico	23	14	2	No	No	Mostly Mexican	26.85	28	123	135	3.31	Fusobacterium
Subject_55	46	Yes	> High school	Mexico	Mexico	32	14	3.75	No	No	Mix	38.59	48.3	110	128.1	2.69	Prevotella
Subject_56	43	Yes	High school	Mexico	Mexico	29	14	2	Yes	No	Mostly Mexican	27.07	9.9	73	76.7	2.1	Prevotella
Subject_57	37	Yes	< High school	Mexico	Mexico	33	4	1	No	No	Only Mexican	34.45	16.5	70	87	2.43	Prevotella
Subject_58	35	Yes	< High school	USA	USA			2.25	No	No	Mix	38.37	36.3	79	92.9	2.2	Prevotella
Subject_59	49	No	< High school	Mexico	USA	21	28	1.5	No	No	Mix	36.66	14.6	95	116.4	2.83	Prevotella
Subject_60	32	Yes	< High school	Mexico	Mexico	20	12	1.5	No	No	Mix	30.58	48.3	137	147	2.86	Fusobacterium
Subject_61	32	Yes	> High school	Mexico	Mexico	25	7	1.75	No	Yes	Mostly Mexican	35.66	36.3	119	128.2	2.85	Fusobacterium
Subject_62	32	Yes	< High school	Mexico	Mexico	17	15	1.5	No	No	Mostly Mexican	45.86	28	130	140.1	3.06	Fusobacterium
Subject_63	28	Yes	High school	Mexico	USA	12	16	3.5	No	No	Mostly Mexican	27.85	16.5	63	76.6	1.53	Streptococcus
Subject_64	44	Yes	< High school	Mexico	Mexico	27	17	1.25	Yes	No	Mix	28.56	84.3	65	86	2.19	Streptococcus
Subject_65	36	Yes	< High school	Mexico	Mexico	18	18	1.25	Yes	No	Mostly Mexican	31.48	36.3	71	77.1	2.38	Prevotella
Subject_66	72	No	< High school	USA	USA			1.5	Yes	No	Mix	29.84	4.9	75	84.4	2.31	Prevotella
Subject_67	37	Yes	< High school	Mexico	USA	24	13	1.75	No	No	Mostly Mexican	29.88	36.3	78	103.7	2.23	Streptococcus
Subject_68	23	No	> High school	Mexico	Mexico	19	4	2	No	Yes	Mostly Mexican	30.28	28	86	103.8	2.01	Streptococcus
Subject_69	45	No	< High school	Mexico	Mexico	28	17	1.5	No	No	Mostly Mexican	27.27	15.9	119	137.9	2.54	Fusobacterium
Subject_70	22	No	High school	USA	USA			4	No	Yes	Mix	21.95	80.3	135	167.5	2.84	Fusobacterium
Subject_71	41	No	High school	Mexico	USA	14	27	3.5	No	Yes	Mostly Mexican	29.15	16.5	89	120.2	2.02	Streptococcus
Subject_72	58	Yes	High school	USA	USA			3.25	No	No	Mostly Mexican	29.89	6.6	79	88.8	2.34	Streptococcus
Subject_73	33	Yes	< High school	Mexico	Mexico	25	8	2	Yes	No	Mostly Mexican	25.25	40.3	122	135.6	2.73	Prevotella
Subject_74	48	Yes	< High school	Mexico	USA	18	30	1.25	No	No	Mix	34.78	102	26	44	1.51	Streptococcus
Subject_75	37	Yes	> High school	USA	USA			4	No	No	Mix	33.61	36.3	140	162.6	3.27	Fusobacterium
Subject_76	35	Yes	> High school	Mexico	Mexico	23	12	3.5	Yes	No	Mostly Mexican	26.68	116.1	112	122.1	3	Prevotella
Subject_77	25	Yes	> High school	Mexico	Mexico	21	4	2	No	No	Only Mexican	22.9	44	121	131.6	2.95	Fusobacterium
Subject_78	39	Yes	> High school	Mexico	Mexico	27	12	1.25	No	No	Mostly Mexican	29.21	44.3	105	145.6	2.99	Prevotella
Subject_79	32	No	> High school	Mexico	Mexico	21	11	2	No	No	Mix	33.49	36.5	143	172.1	3.19	Fusobacterium
Subject_80	37	Yes	< High school	Mexico	Mexico	25	12	2.25	No	No	Mostly Mexican	25.1	9.3	132	146.9	2.75	Fusobacterium
Subject_81	36	Yes	< High school	Mexico	Mexico	23	13	1.75	No	No	Mostly Mexican	28.66	16.5	128	159.7	2.54	Fusobacterium
Subject_82	64	No	< High school	Mexico	USA	27	37	1.5	Yes	No	Mostly Mexican	28.88	9.9	89	116.6	2.17	Streptococcus
Subject_83	49	Yes	> High school	Mexico	USA	19	30	3.5	No	Yes	Mostly Mexican	25.15	36.3	67	71	2.8	Prevotella
Subject_84	39	Yes	< High school	Mexico	Mexico	19	20	2.75	Yes	No	Mostly Mexican	28.47	28.5	79	106.1	2.3	Prevotella
Subject_85	21	Yes	> High school	USA	USA			4	No	No	Mix	26.69	36.5	110	129.5	2.96	Fusobacterium
Subject_86	45	Yes	> High school	Mexico	USA	22	23	1.5	No	No	Mix	42.93	36.3	71	74.8	2.38	Streptococcus
Subject_87	62	Yes	< High school	Mexico	USA	28	34	1	No	No	Only Mexican	28.27	36.3	92	95.9	2.27	Streptococcus
Subject_88	36	Yes	High school	Mexico	Mexico	21	15	2.5	No	No	Mix	31.99	36.3	105	142.5	2.7	Fusobacterium
Subject_89	53	No	High school	USA	USA			2	Yes	No	Only Mexican	41.71	0	88	104.2	2.56	Prevotella
Subject_90	35	Yes	< High school	Mexico	Mexico	24	11	3	Yes	Yes	Mix	19.93	16.5	110	124	2.54	Streptococcus
Subject_91	28	Yes	> High school	Mexico	Mexico	24	4	1.25	No	No	Mix	42.97	36.3	82	91.5	2.56	Prevotella
Subject_92	41	Yes	> High school	Mexico	Mexico	29	12	1.75	No	No	Mix	23.8	3.3	71	74.3	2.44	Streptococcus
Subject_93	32	No	> High school	Mexico	Mexico	22	10	1.25	No	No	Only Mexican	29.09	9.9	97	124.1	2.48	Prevotella
Subject_94	33	Yes	< High school	Mexico	Mexico	32	1	1	Yes	Yes	Mostly Mexican	25.95	38.3	98	113.8	2.46	Fusobacterium
Subject_95	32	Yes	< High school	Mexico	Mexico	17	15	1.25	No	No	Mostly Mexican	28.27	36.3	80	97	2.38	Streptococcus
Subject_96	42	Yes	< High school	Mexico	Mexico	27	15	2.25	No	No	Mix	26.77	36.3	86	103.1	2.46	Streptococcus
Subject_97	26	Yes	< High school	Mexico	Mexico	21	5	1.5	No	No	Mostly Mexican	27.21	124.3	137	158.4	3.31	Fusobacterium
Subject_98	25	Yes	High school	Mexico	Mexico	22	3	2	Yes	No	Mix	30.9	28	115	138.6	2.92	Prevotella
Subject_99	37	Yes	< High school	Mexico	Mexico	27	10	1	No	No	Mix	24.79	3.3	109	119	2.86	Prevotella
Subject_100	48	Yes	< High school	Mexico	Mexico	25	23	1	No	No	Mostly Mexican	32.19	44.3	95	116	2.87	Prevotella
Subject_101	28	Yes	< High school	Mexico	Mexico	27	1	1	No	No	Mix	25.46	28	75	100.1	2.02	Streptococcus
Subject_102	60	Yes	High school	USA	USA			2.75	Yes	No	Mix	27.09	48.3	107	134.3	2.77	Prevotella
Subject_103	63	No	< High school	Mexico	Mexico	49	14	2.25	No	No	Only Mexican	31.39	3.3	129	152.1	2.96	Fusobacterium
Subject_104	63	Yes	< High school	Mexico	Mexico	39	24	1.25	No	No	Mostly Mexican	34.59	36.3	79	100.9	2.36	Streptococcus
Subject_105	36	Yes	< High school	Mexico	Mexico	22	14	2	Yes	No	Mix	35.71	36.3	111	117.7	2.68	Fusobacterium
Subject_106	39	Yes	< High school	Mexico	Mexico	26	13	1.75	No	No	Only Mexican	25.1	36.3	135	157.5	2.9	Fusobacterium
Subject_107	31	Yes	> High school	Mexico	Mexico	26	5	1.5	No	No	Only Mexican	23.27	6.6	83	102	2.17	Streptococcus
Subject_108	44	Yes	High school	Mexico	Mexico	32	12	1.5	Yes	No	Mix	29.22	20	60	62.1	2.12	Streptococcus
Subject_109	30	Yes	< High school	Mexico	Mexico	20	10	1.25	No	No	Mostly Mexican	23.28	16.5	84	97.6	2.71	Prevotella
Subject_110	53	Yes	< High school	Mexico	Mexico	48	5	1	No	No	Only Mexican	26.7	28	49	65.5	2.07	Streptococcus
Subject_111	38	Yes	< High school	Mexico	Mexico	21	17	1.75	No	No	Only Mexican	37.79	36.3	169	208.1	3.24	Fusobacterium
Subject_112	34	Yes	< High school	Mexico	Mexico	18	16	1.25	No	No	Mostly Mexican	28.05	10.6	52	63.3	2.21	Streptococcus
Subject_113	25	No	High school	USA	USA			4	No	No	Mostly American	24.47	48	125	146.4	2.46	Fusobacterium
Subject_114	44	Yes	< High school	Mexico	Mexico	27	17	1.5	No	No	Mostly Mexican	24.21	9.9	128	163.2	2.83	Prevotella
Subject_115	48	Yes	< High school	Mexico	Mexico	27	21	1	No	No	Mostly Mexican	34.63	36.3	114	144	3.11	Fusobacterium
Subject_116	37	Yes	> High school	Mexico	USA	10	27	4	No	No	Mix	32.95	4.9	88	105.1	2.49	Streptococcus
Subject_117	39	Yes	High school	Mexico	Mexico	22	17	1.5	No	No	Only Mexican	25.44	86.3	70	106.3	1.98	Streptococcus
Subject_118	23	No	High school	Mexico	USA	7	16	3.25	No	No	Mix	20.24	16.5	135	146.9	3.15	Fusobacterium
Subject_119	39	Yes	< High school	Mexico	Mexico	29	10	1.5	No	No	Only Mexican	30.34	16.5	78	91.6	2.24	Streptococcus
Subject_120	22	Yes	High school	Mexico	Mexico	17	5	2.75	No	No	Only Mexican	22.96	68	98	121.3	2.58	Prevotella
Subject_121	26	Yes	< High school	USA	Mexico	18	8	1	No	No	Mostly Mexican	39.77	3.3	87	125.5	2.42	Streptococcus
Subject_122	55	No	> High school	Mexico	USA	6	49		No	No	Mix	29.46	28	75	100.3	1.46	Streptococcus
Subject_123	33	Yes	High school	Mexico	Mexico	26	7	1.5	No	No	Mostly Mexican	28.89	3.3	89	102.1	2.57	Prevotella
Subject_124	30	Yes	> High school	Mexico	USA	12	18	2	No	No	Only Mexican	27.22	80.3	136	143	3.1	Fusobacterium
Subject_125	32	Yes	< High school	Mexico	USA	15	17	2.25	No	No	Mix	31.79	0	89	108.1	2.6	Prevotella
Subject_126	52	Yes	< High school	Mexico	Mexico	32	20	1	Yes	No	Mostly Mexican	37.47	16.5	104	119.5	2.44	Prevotella
Subject_127	35	Yes	High school	Mexico	USA	0	35	3.25	No	Yes	Mix	30.37	36.3	95	114.5	2.75	Prevotella
Subject_128	66	No	High school	USA	USA			3	No	Yes	Mix	43.07	16.5	52	55.8	2.42	Prevotella
Subject_129	34	Yes	> High school	Mexico	Mexico	21	13	2	No	No	Mix	30.21	80.3	44	78	1.49	Streptococcus
Subject_130	47	No	< High school	Mexico	Mexico	38	9	2	No	No	Mostly Mexican	36.51	6.6	72	85.9	2.1	Prevotella
Subject_131	20	Yes	High school	USA	USA			4	No	Yes	Mix	28.9	3.3	124	141.6	2.95	Fusobacterium
Subject_132	21	Yes	High school	USA	USA			3	No	No	Mostly Mexican	34.78	16.5	72	100.9	2.32	Streptococcus
Subject_133	47	Yes	> High school	Mexico	Mexico	39	8	1.75	No	No	Mostly Mexican	23.35	36.3	114	121.6	2.98	Fusobacterium
Subject_134	55	No	High school	USA	USA			4	Yes	Yes	Mix	45.65	6.6	64	72.7	1.83	Streptococcus
Subject_135	45	Yes	< High school	Mexico	Mexico	32	13	1	No	No	Mostly Mexican	40.52	16.5	94	119	2.31	Prevotella
Subject_136	54	Yes	< High school	Mexico	Mexico	43	11	1.75	Yes	No	Mostly Mexican	32.93	16.5	104	111	2.97	Prevotella
Subject_137	35	Yes	< High school	Mexico	USA	16	19	1.5	No	No	Mostly Mexican	29.56	48.3	123	136.6	3.26	Fusobacterium
Subject_138	44	Yes	High school	Mexico	USA	17	27	2.25	Yes	No	Mix	25.95	36.3	79	94.1	2.52	Prevotella
Subject_139	45	Yes	High school	Mexico	Mexico	32	13	1.75	No	No	Mix	31.28	1.6	75	79	2.66	Prevotella
Subject_140	38	Yes	< High school	Mexico	Mexico	22	16	1.25	No	No	Mostly Mexican	23.33	16.5	96	111.8	2.54	Prevotella
Subject_141	31	Yes	< High school	Mexico	Mexico	21	10	2	Yes	No	Mostly Mexican	26.89	36.3	118	128.2	2.96	Prevotella
Subject_142	48	Yes	< High school	Mexico	Mexico	38	10	1.5	No	No	Mix	29.43	68.1	86	105	1.99	Streptococcus
Subject_143	63	Yes	< High school	Mexico	Mexico	46	17	1.75	No	No	Mostly American	43.79	62	62	79	1.94	Streptococcus
Subject_144	33	Yes	< High school	USA	USA			3.5	No	No	Mix	45.57	36.3	107	135.1	2.62	Fusobacterium
Subject_145	40	Yes	> High school	Mexico	Mexico	39	1	2.5	No	No	Mostly Mexican	26.05	48.3	88	107.1	2.76	Prevotella
Subject_146	42	Yes	> High school	Mexico	Mexico	35	7	1.75	No	No	Mostly Mexican	27.37	36.3	110	121.9	2.45	Prevotella
Subject_147	38	Yes	High school	Mexico	USA	18	20	2.5	No	No	Mix	29.68	48.3	69	108.4	1.62	Streptococcus
Subject_148	36	Yes	> High school	Mexico	Mexico	24	12	1.5	No	No	Mostly Mexican	27.52	16.5	87	99.2	2.47	Prevotella
Subject_149	44	Yes	> High school	Mexico	Mexico	39	5	2	No	No	Mostly Mexican	31.52	70.3	82	92.9	1.96	Streptococcus
Subject_150	47	Yes	High school	Mexico	Mexico	45	2	2.25	No	No	Mostly Mexican	26.38	36.3	111	145.5	2.92	Prevotella
Subject_151	38	Yes	< High school	Mexico	USA	18	20	2.25	No	No	Mix	27.78	36.3	68	80.4	2.23	Streptococcus
Subject_152	43	Yes	< High school	Mexico	Mexico	33	10	2	No	No	Mix	26.3	16.5	130	165.1	2.87	Fusobacterium
Subject_153	45	Yes	< High school	Mexico	Mexico	31	14	1.25	Yes	No	Mostly Mexican	29.48	36.3	89	125.1	2.53	Prevotella
Subject_154	28	Yes	< High school	Mexico	Mexico	17	11	2	Yes	No	Mix	22.08	36.3	72	100.1	2.14	Streptococcus
Subject_155	30	Yes	> High school	Mexico	Mexico	23	7	1.75	No	No	Only Mexican	32.55	28	103	122.1	2.32	Fusobacterium
Subject_156	33	Yes	High school	Mexico	Mexico	22	11	2	Yes	Yes	Mix	25.96	32	70	95.7	2.01	Streptococcus
Subject_157	43	No	> High school	USA	USA	13	30	3.25	No	No	Mostly American	28.53	20	107	148.6	2.51	Fusobacterium
Subject_158	39	Yes	> High school	Mexico	Mexico	23	16	1.25	No	No	Mostly Mexican	34.81	56.3	79	102.8	2.04	Streptococcus
Subject_159	35	Yes	< High school	USA	USA			4	No	No	Mix	35.48	36.3	118	135.3	2.67	Fusobacterium
Subject_160	29	No	< High school	Mexico	Mexico	17	12	1.75	No	No	Only Mexican	26.07	70.3	76	85.1	2.6	Prevotella
Subject_161	42	Yes	< High school	Mexico	Mexico	30	12	1.5	Yes	No	Mostly Mexican	25.44	36.3	126	141.3	3.01	Fusobacterium
Subject_162	40	Yes	> High school	Mexico	USA	21	19	2.25	No	Yes	Mix	33.2	0	106	161.5	2.49	Fusobacterium
Subject_163	47	Yes	< High school	Mexico	Mexico	33	14	1	Yes	No	Only Mexican	22.1	36.3	68	76.7	1.91	Streptococcus
Subject_164	40	Yes	> High school	Mexico	Mexico	28	12	2.5	Yes	No	Mix	29.84	16.5	74	85.4	2.51	Prevotella
Subject_165	45	Yes	< High school	Mexico	USA	17	28	1.5	No	No	Only Mexican	49.73	16.5	92	152	2.26	Prevotella
Subject_166	46	No	> High school	Mexico	Mexico	41	5	2.75	No	No	Only Mexican	25.76	36.3	87	92	2.65	Prevotella
Subject_167	34	Yes	< High school	Mexico	Mexico	26	8	2	No	No	Mostly Mexican	25.78	28	116	149.5	2.82	Fusobacterium
Subject_168	33	Yes	High school	Mexico	Mexico	20	13	2	Yes	No	Only Mexican	23.57	16.5	94	113.7	2.33	Prevotella
Subject_169	48	No	< High school	Mexico	USA	23	25	3	No	Yes	Mostly Mexican	28.41	43.9	103	130.1	2.58	Fusobacterium
Subject_170	63	Yes	High school	Mexico	USA	27	36	3.75	Yes	No	Mix	28.18	16.5	109	119.7	2.49	Fusobacterium
Subject_171	40	Yes	> High school	Mexico	USA	5	35	4	No	No	Mix	32.94	36.3	131	146.3	2.78	Fusobacterium
Subject_172	34	Yes	High school	Mexico	USA	15	19	1.5	No	No	Mostly Mexican	33.11	48.3	96	109.6	2.45	Streptococcus
Subject_173	38	Yes	> High school	Mexico	Mexico	29	9	1.75	No	No	Mostly Mexican	27.37	16.5	160	177.8	3.57	Fusobacterium
Subject_174	36	Yes	High school	USA	USA			4	No	No	Mix	87.77	28	67	82.1	2.19	Streptococcus
Subject_175	35	Yes	High school	Mexico	Mexico	18	17	1.75	No	No	Mix	22.67	36.5	94	117.2	2.05	Streptococcus
Subject_176	40	No	High school	Mexico	Mexico	22	18	3.25	No	No	Mix	22.12	29.9	94	123	2.22	Prevotella
Subject_177	40	Yes	< High school	Mexico	Mexico	23	17	2.25	No	No	Mix	30.21	80.3	83	102.1	1.94	Streptococcus
Subject_178	37	Yes	> High school	USA	USA			3.5	No	No	Mix	23.61	16.5	62	73.4	1.94	Streptococcus
Subject_179	67	Yes	High school	USA	USA			2.75	Yes	No	Mix	33.35	48.3	75	90	2.49	Streptococcus
Subject_180	59	Yes	High school	USA	USA			3.5	No	No	Mix	46.61	9.9	55	61.6	1.98	Streptococcus
Subject_181	36	Yes	> High school	Mexico	Mexico	28	8	2	No	No	Mostly Mexican	33.94	36.3	78	101.3	2.24	Prevotella
Subject_182	53	Yes	> High school	USA	USA			4	No	Yes	Mostly Mexican	33.51	16.5	72	81.8	2.49	Streptococcus
Subject_183	36	Yes	< High school	Mexico	Mexico	32	4	1	No	No	Only Mexican	33.54	28	131	173.3	2.61	Fusobacterium
Subject_184	44	Yes	< High school	Mexico	Mexico	34	10	1.25	No	Yes	Mix	28.96	16.5	82	86.5	2.64	Prevotella
Subject_185	26	Yes	> High school	Mexico	Mexico	23	3	1.5	Yes	No	Mostly Mexican	23.34	36.3	36	76	0.89	Streptococcus
Subject_186	34	Yes	< High school	Mexico	Mexico	25	9	2.25	No	No	Mix	27.41	70.3	83	87	2.56	Prevotella
Subject_187	38	No	High school	USA	USA			3.5	Yes	No	Mix	31.09	28	90	118.1	2.36	Prevotella
Subject_188	49	Yes	< High school	Mexico	Mexico	29	20	1.75	No	No	Mix	30.76	28	81	91	2.34	Streptococcus
Subject_189	53	Yes	< High school	Mexico	USA	19	34	2.25	No	No	Mostly Mexican	32.73	49	84	99.5	2.51	Prevotella
Subject_190	31	No	> High school	USA	USA			4	No	No	Mix	32.01	44.3	69	92.3	2.15	Streptococcus
Subject_191	68	Yes	< High school	Mexico	USA	29	39	2	No	No	Mix	29.57	60.3	68	75.1	2.08	Streptococcus
Subject_192	37	Yes	> High school	Mexico	USA	6	31	4	No	No	Mix	33.12	36.3	79	84.5	2.02	Streptococcus
Subject_193	32	Yes	< High school	Mexico	Mexico	31	1	3.25	No	No	Mix	29.22	36.3	116	130.5	2.15	Fusobacterium
Subject_194	25	No	< High school	Mexico	Mexico	14	11	3.25	Yes	No	Mix	23.99	36.3	123	155.5	2.69	Fusobacterium
Subject_195	39	Yes	< High school	Mexico	Mexico	24	15	1.25	No	No	Only Mexican	29.44	3.3	94	117.1	2.06	Streptococcus
Subject_196	48	Yes	< High school	Mexico	Mexico	22	26	1.75	Yes	No	Mix	29.3	36.3	94	125.5	2.44	Prevotella
Subject_197	36	No	< High school	Mexico	Mexico	24	12	1	No	No	Mix	27.41	9.9	105	156.7	2.3	Fusobacterium
Subject_198	39	Yes	< High school	Mexico	Mexico	24	15	2	Yes	No	Mix	19.12	16.5	109	142	3.26	Prevotella
Subject_199	24	Yes	< High school	Mexico	Mexico	19	5	1.75	Yes	No	Mostly Mexican	29.89	96.3	96	110.5	1.97	Streptococcus
Subject_200	40	Yes	> High school	Mexico	Mexico	34	6	2	No	No	Mostly Mexican	42.21	40.3	100	147.3	2.48	Fusobacterium
Subject_201	31	Yes	< High school	Mexico	Mexico	16	15	1.75	No	No	Mix	34.1	16.5	76	99.1	1.92	Streptococcus
Subject_202	35	Yes	High school	Mexico	Mexico	29	6	1.75	No	No	Mostly Mexican	22.92	48.3	73	90	2.45	Streptococcus
Subject_203	41	Yes	< High school	Mexico	Mexico	28	13	2.75	No	No	Mix	31.44	28	86	103.3	2.45	Prevotella
Subject_204	46	Yes	High school	Mexico	Mexico	31	15	2.5	No	No	Mix	38.98	68.1	122	155.3	2.74	Fusobacterium
Subject_205	38	Yes	High school	Mexico	Mexico	22	16	3.5	No	No	Mostly Mexican	31.79	34	92	123.9	2.09	Prevotella
Subject_206	56	No	< High school	Mexico	Mexico	46	10	1	Yes	No	Only Mexican	28.06	16.5	99	108	2.01	Prevotella
Subject_207	50	Yes	< High school	Mexico	Mexico	40	10	1	No	No	Mostly Mexican	32.09	48.3	106	127.2	2.68	Prevotella
Subject_208	38	Yes	> High school	Mexico	Mexico	23	15	2	No	Yes	Mostly Mexican	25.8	16.5	112	116.8	3.11	Fusobacterium
Subject_209	66	Yes	High school	USA	USA			4	No	No	Mix	25.59	16.5	87	102.3	2.32	Streptococcus
Subject_210	34	Yes	< High school	Mexico	Mexico	18	16	1	Yes	No	Mostly Mexican	30.8	36.3	102	131.5	2.1	Prevotella
Subject_211	36	Yes	< High school	Mexico	Mexico	29	7	1	No	No	Mostly Mexican	24.31	112.1	107	140.1	2.36	Fusobacterium
Subject_212	47	Yes	> High school	Mexico	USA	5	42	4	No	Yes	Mix	38.66	28.5	62	96.2	2.12	Streptococcus
Subject_213	78	No	< High school	USA	USA			3.25	No	Yes	Mix	38.04	3.3	128	135.1	3.19	Fusobacterium
Subject_214	35	Yes	> High school	Mexico	Mexico	21	14	2.25	No	Yes	Mostly Mexican	24.58	36.5	94	106.4	2.27	Prevotella
Subject_215	39	No	< High school	Mexico	Mexico	20	19	2	Yes	No	Mostly Mexican	23.48	80.3	89	112	2.44	Prevotella
Subject_216	31	Yes	< High school	Mexico	Mexico	16	15	1.25	No	No	Only Mexican	33.2	36	70	87	2.55	Prevotella
Subject_217	55	Yes	> High school	Mexico	Mexico	29	26	1	No	No	Mostly Mexican	37.49	36.3	96	125.5	2.65	Prevotella
Subject_218	35	Yes	> High school	USA	USA			3.75	No	Yes	Mix	29.68	128.3	130	145	2.84	Fusobacterium
Subject_219	36	Yes	< High school	Mexico	Mexico	21	15	2.25	No	No	Mix	32.59	6.6	71	101.7	2.23	Streptococcus
Subject_220	30	Yes	< High school	Mexico	Mexico	25	5	1.25	Yes	No	Mix	34.15	144.3	70	91.1	1.25	Streptococcus
Subject_221	66	Yes	< High school	USA	USA			4	No	No	Mix	42.76	16.5	85	104.4	2.34	Streptococcus
Subject_222	42	Yes	High school	Mexico	Mexico	32	10	2.25	No	No	Mix	34.13	76.3	139	156.1	3.3	Fusobacterium
Subject_223	33	No	< High school	Mexico	Mexico	18	15	1.5	Yes	Yes	Only Mexican	37.84	36.3	109	134.1	2.45	Fusobacterium
Subject_224	45	Yes	< High school	Mexico	USA	20	25	1.5	Yes	No	Mix	31.11	16.5	83	104	2.23	Streptococcus
Subject_225	61	Yes	< High school	Mexico	USA	30	31	4	No	Yes	Mostly Mexican	22.7	56.5	40	70	1.56	Streptococcus
Subject_226	36	Yes	> High school	Mexico	Mexico	20	16	2	No	No	Mix	33.43	36.3	111	138.2	2.98	Prevotella
Subject_227	43	Yes	< High school	Mexico	USA	15	28	2	No	No	Mostly Mexican	27.96	80.3	62	75	2.24	Streptococcus
Subject_228	34	Yes	< High school	Mexico	Mexico	23	11	1.75	No	No	Mix	30.58	36.3	67	88.1	2.16	Prevotella
Subject_229	33	Yes	< High school	Mexico	Mexico	22	11	1.25	No	No	Mix	30.23	28	159	178.9	3.4	Fusobacterium
Subject_230	34	No	> High school	USA	USA			4	No	No	Mix	23.99	68.1	97	116.3	2.38	Streptococcus
Subject_231	39	No	< High school	Mexico	Mexico	34	5	1.25	No	No	Mix	45.72	16.5	120	136.9	2.38	Fusobacterium
Subject_232	33	Yes	High school	Mexico	Mexico	20	13	2	No	No	Mostly Mexican	29.99	9.9	105	120.8	2.37	Prevotella
Subject_233	40	Yes	< High school	Mexico	USA	22	18	2.75	Yes	No	Mix	29.51	84.5	130	150.3	2.55	Fusobacterium
Subject_234	33	Yes	High school	Mexico	Mexico	18	15	2.5	No	No	Only Mexican	29.69	36.3	65	80.3	2.16	Streptococcus
Subject_235	43	Yes	> High school	Mexico	USA	16	27	2.5	No	No	Mix	32.79	16.5	36	36.6	1.94	Streptococcus
Subject_236	69	No	> High school	USA	USA			3	Yes	No	Mix	25.48	1.6	81	102.4	2.5	Streptococcus
Subject_237	45	Yes	> High school	Mexico	Mexico	25	20	2.25	Yes	No	Mostly Mexican	24.59	9.9	119	167.3	2.9	Fusobacterium
Subject_238	63	No	< High school	Mexico	Mexico	40	23	3	No	No	Mostly Mexican	42.23	36.5	107	123.2	2.55	Prevotella
Subject_239	28	Yes	High school	Mexico	Mexico	13	15	3.25	No	Yes	Mix	30.65	52.3	84	91.1	2.66	Prevotella
Subject_240	33	Yes	High school	Mexico	Mexico	24	9	2	No	No	Mostly Mexican	25.84	36.3	89	99	2.03	Streptococcus
Subject_241	39	Yes	High school	USA	Mexico	22	17	2.75	Yes	No	Mix	39.93	36.3	96	109.9	2.51	Prevotella
Subject_242	37	Yes	High school	Mexico	Mexico	32	5	2.5	Yes	No	Mix	25.19	36.3	99	127.9	3.01	Prevotella
Subject_243	28	Yes	High school	Mexico	USA	9	19	3	No	No	Mostly Mexican	21.49	76.3	64	68.1	1.97	Streptococcus
Subject_244	50	Yes	High school	Mexico	USA	26	24	2	No	No	Only Mexican	32.22	16.5	69	77.3	2.31	Prevotella
Subject_245	35	Yes	< High school	Mexico	Mexico	20	15	2	No	No	Mix	23.86	9.9	74	100.3	2.34	Streptococcus
Subject_246	35	No	< High school	Mexico	Mexico	19	16	1.5	No	No	Mix	31.53	9.9	116	146.7	2.52	Fusobacterium
Subject_247	32	No	> High school	USA	USA			4	No	No	Mix	30.61	40	87	99.2	2.52	Prevotella
Subject_248	65	No	< High school	Mexico	Mexico	55	10	1	No	No	Only Mexican	34.83	0	64	67.5	2.42	Prevotella
Subject_249	38	Yes	High school	Mexico	Mexico	27	11	1.5	No	No	Mix	32.03	28	116	135.7	2.38	Fusobacterium
Subject_250	54	Yes	< High school	Mexico	Mexico	37	17	1.75	Yes	No	Mix	31.93	4.9	69	86.5	2.02	Streptococcus
Subject_251	41	No	< High school	Mexico	Mexico	28	13	2.25	No	No	Mix	30.98	42.3	98	111.8	2.94	Streptococcus
Subject_252	53	Yes	< High school	Mexico	USA	10	43	3	Yes	No	Mostly Mexican	36.13	84.5	72	78.1	2.14	Streptococcus
Subject_253	28	No	< High school	Mexico	Mexico	19	9	3.25	No	No	Mostly Mexican	30.45	9.9	92	121.3	1.76	Streptococcus
Subject_254	39	Yes	High school	Mexico	USA	14	25	2.75	Yes	No	Mix	28.07	36.3	104	115.4	2.33	Prevotella
Subject_255	39	Yes	High school	Mexico	USA	18	21	3.25	Yes	No	Only Mexican	29.7	36.3	127	190	2.44	Fusobacterium
Subject_256	65	Yes	< High school	Mexico	Mexico	34	31	1.5	Yes	No	Only Mexican	24.51	40	105	128.8	2.86	Prevotella
Subject_257	36	Yes	> High school	USA	USA			4	No	No	Only Mexican	36.7	6.6	103	119.2	2.62	Prevotella
Subject_258	35	No	> High school	Mexico	USA	5	30	4	No	No	Mix	37.18	24.5	51	56.1	2.29	Streptococcus
Subject_259	56	Yes	< High school	Mexico	Mexico	26	30	3	No	No	Mix	31.54	16.5	91	110.1	2.42	Prevotella
Subject_260	45	Yes	< High school	Mexico	USA	20	25	2	Yes	Yes	Mostly Mexican	38.38	36.3	95	101.1	2.56	Prevotella
Subject_261	30	Yes	< High school	Mexico	Mexico	17	13	2	No	No	Mix	24.6	36	96	112.2	2.14	Prevotella
Subject_262	36	Yes	< High school	Mexico	Mexico	20	16	2	No	No	Mix	29.99	36.3	108	124.3	2.27	Prevotella
Subject_263	33	Yes	< High school	Mexico	Mexico	18	15	1.75	Yes	No	Only Mexican	31.31	36.3	156	208.9	3.23	Fusobacterium
Subject_264	43	Yes		Mexico	USA	15	28	2	No	No	Mostly Mexican	30.65	36.3	77	105.9	1.82	Streptococcus
Subject_265	33	No	High school	USA	USA			4	No	Yes	Mix	36.14	36.3	104	141.8	2.59	Prevotella
Subject_266	29	No	> High school	USA	USA			4	No	No	Mix	34.21	26.6	128	151.1	2.9	Fusobacterium
Subject_267	34	No	< High school	Mexico	Mexico	21	13	2.25	No	Yes	Mostly Mexican	36.95	16.5	72	97.3	1.83	Streptococcus
Subject_268	27	Yes	High school	Mexico	Mexico	22	5	1.5	No	No	Only Mexican	27.6	16.5	87	100.2	2.21	Streptococcus
Subject_269	45	Yes	> High school	Mexico	Mexico	25	20	2.75	No	No	Mix	28.33	4.9	127	150	2.68	Fusobacterium
Subject_270	53	No	< High school	Mexico	Mexico	33	20	1.25	No	No	Only Mexican	43.62	16.5	67	84.5	2.12	Streptococcus
Subject_271	39	Yes	< High school	Mexico	Mexico	24	15	1.75	No	No	Only Mexican	27.52	40.3	121	138.8	3.24	Fusobacterium
Subject_272	43	Yes	> High school	Mexico	USA	19	24	1.5	No	No	Mix	29.44	48.3	118	131.1	3.22	Fusobacterium
Subject_273	24	Yes	< High school	Mexico	Mexico	20	4	1.75	No	No	Mostly Mexican	27.67	36.3	130	157.6	3.14	Prevotella
Subject_274	25	Yes	> High school	Mexico	Mexico	17	8	1.5	No	No	Only Mexican	29.9	36.3	104	114.7	2.19	Fusobacterium
Subject_275	40	Yes	> High school	Mexico	Mexico	29	11	2.75	No	No	Mix	38.73	16.5	157	168.9	3.63	Fusobacterium
Subject_276	39	Yes	< High school	Mexico	Mexico	24	15	1.75	No	No	Only Mexican	30	36.3	82	90.1	2.51	Streptococcus
Subject_277	28	No	< High school	Mexico	Mexico	18	10	1.75	No	No	Mix	39.59	16.5	118	128.9	2.88	Fusobacterium
Subject_278	52	Yes	< High school	Mexico	USA	14	38	2.5	Yes	No	Only Mexican	42.42	16.5	114	147.3	2.72	Fusobacterium
Subject_279	51	Yes	< High school	Mexico	Mexico	39	12	1	Yes	No	Only Mexican	41.52	16.5	76	99.8	2.3	Prevotella
Subject_280	41	Yes	High school	Mexico	Mexico	32	9	2	No	No	Mix	34.21	28	73	90.1	2.45	Prevotella
Subject_281	24	Yes	High school	Mexico	USA	12	12	2.5	No	Yes	Mix	25.44	16.5	118	143	2.6	Fusobacterium
Subject_282	24	Yes	High school	Mexico	USA	2	22	3.5	Yes	No	Mix	27.79	9.9	78	101.3	2.33	Streptococcus
Subject_283	21	Yes	High school	USA	USA			3.5	No	No	Mostly Mexican	18.46	28	151	167.2	3.76	Fusobacterium
Subject_284	41	No	> High school	Mexico	Mexico	24	17	2.25	No	No	Mix	28.67	28	139	180.3	2.84	Fusobacterium
Subject_285	38	Yes	< High school	Mexico	USA	16	22	1.75	No	No	Only Mexican	39.61	28	146	179.7	2.63	Fusobacterium
Subject_286	52	Yes	< High school	Mexico	USA	23	29	2	No	No	Mix	26.3	36.3	78	109.9	2.62	Prevotella
Subject_287	33	Yes	< High school	USA	USA			3.5	No	No	Mix	31.72	56.3	72	95.8	1.99	Streptococcus
Subject_288	41	Yes	High school	Mexico	USA	19	22	2.5	No	No	Mostly Mexican	34.83	28	92	124.5	2.53	Streptococcus
Subject_289	36	No	> High school	USA	USA			4	No	Yes	Mix	33.24	9.9	73	98.3	1.79	Streptococcus
Subject_290	56	Yes	> High school	Mexico	USA	23	33	3.75	No	Yes	Mostly Mexican	29.7	16.5	46	56.5	2.26	Prevotella
Subject_291	28	Yes	High school	Mexico	Mexico	24	4	1.5	No	Yes	Mostly Mexican	24.36	48.3	123	154.2	2.69	Fusobacterium
Subject_292	39	Yes	> High school	Mexico	Mexico	38	1	1.25	No	No	Only Mexican	30.01	16.5	92	107.8	1.8	Fusobacterium
Subject_293	39	Yes	> High school	Mexico	Mexico	28	11	2	Yes	No	Mostly Mexican	24.03	28	104	113.1	2.7	Prevotella
Subject_294	33	Yes	< High school	Mexico	USA	16	17	2.25	No	No	Mix	27.43	36.3	108	142.4	2.59	Fusobacterium
Subject_295	30	Yes	High school	Mexico	USA	13	17	2	No	No	Mix	50.8	36	125	145.3	2.86	Fusobacterium
Subject_296	27	Yes	High school	Mexico	Mexico	19	8	1.75	No	No	Mix	18.32	16.5	130	157.6	2.2	Fusobacterium
Subject_297	53	No	< High school	USA	USA			3	No	No	Mix	41.14	16	126	144.8	2.68	Fusobacterium
Subject_298	38	Yes	< High school	Mexico	USA	20	18	1.5	Yes	No	Mix	28.82	16.5	88	115.2	2.76	Streptococcus
Subject_299	33	Yes	< High school	Mexico	Mexico	20	13	1.75	Yes	No	Mix	26.92	40	83	90.6	2.3	Streptococcus
Subject_300	35	No	< High school	Mexico	Mexico	20	15	2.25	No	No	Mostly Mexican	30.93	36.3	140	155	2.92	Fusobacterium
Subject_301	31	Yes	> High school	Mexico	Mexico	21	10	1.5	Yes	No	Mix	27.28	36.3	81	93.4	2.4	Streptococcus
Subject_302	52	Yes	High school	Mexico	USA	11	41	3.75	No	Yes	Mix	24.71	3.3	77	100.3	2.69	Prevotella
Subject_303	41	Yes	High school	Mexico	Mexico	27	14	1.5	No	No	Mostly Mexican	28.43	20	97	130.8	2.38	Fusobacterium
Subject_304	43	Yes	High school	USA	USA			3.5	No	Yes	Mix	36.26	36.3	112	139	3.05	Fusobacterium
Subject_305	28	Yes	High school	USA	USA			2.75	Yes	No	Mix	38.2	56.3	97	126.2	2.19	Prevotella
Subject_306	67	No	> High school	Mexico	USA	25	42	2.5	No	No	Mostly Mexican	29.72	36.3	112	158.5	2.82	Prevotella
Subject_307	37	Yes	< High school	Mexico	Mexico	19	18	3.75	Yes	No	Mix	35.72	52.3	63	67.2	1.83	Streptococcus
Subject_308	32	Yes	High school	USA	USA			3.25	No	Yes	Mix	37.03	22.5	57	92	1.32	Streptococcus
Subject_309	29	Yes	< High school	Mexico	Mexico	19	10	1.5	No	Yes	Only Mexican	35.63	9.9	142	177.8	3.13	Fusobacterium
Subject_310	31	Yes	> High school	USA	Mexico	23	8	3	No	No	Other	24.04	30	68	79.4	2.32	Streptococcus
Subject_311	49	No	> High school	Mexico	Mexico	31	18	1.5	No	No	Mostly Mexican	33.43	36.3	62	83.1	1.56	Streptococcus
Subject_312	38	Yes	< High school	Mexico	Mexico	23	15	1.25	No	No	Only Mexican	28.62	36.3	71	101	2.24	Streptococcus
Subject_313	42	Yes	< High school	Mexico	Mexico	38	4	1.25	Yes	No	Mostly Mexican	27.84	28	112	131.9	2.52	Fusobacterium
Subject_314	54	No	< High school	Mexico	Mexico	34	20	1	No	No	Mix	31.31	36.3	98	130.5	2.59	Fusobacterium
Subject_315	45	No	> High school	Mexico	USA	21	24	2.5	No	No	Mix	30.12	72.9	54	60.4	1.95	Streptococcus
Subject_316	41	Yes	High school	Mexico	Mexico	26	15	2	No	Yes	Mostly Mexican	29.52	70.3	126	147.4	2.86	Fusobacterium
Subject_317	30	No	High school	Mexico	USA	11	19	2.5	No	Yes	Mix	24.63	16.5	100	148	2.22	Prevotella
Subject_318	41	Yes	< High school	Mexico	Mexico	28	13	1.75	No	No	Mostly Mexican	29.59	9.9	126	143.3	2.91	Fusobacterium
Subject_319	46	Yes	< High school	Mexico	Mexico	24	22	1.75	No	No	Mix	38.77	28	134	153.7	3.09	Prevotella
Subject_320	40	Yes	< High school	Mexico	Mexico	31	9	1.25	No	No	Only Mexican	33.32	36.3	112	137.6	1.72	Fusobacterium
Subject_321	68	No	High school	USA	USA			3.75	No	No	Mostly American	27.23	29.9	64	83.5	2.3	Streptococcus
Subject_322	37	Yes	< High school	Mexico	USA	18	19	2.25	No	No	Mostly Mexican	39.25	36.3	91	119.1	2.17	Streptococcus
Subject_323	48	Yes	> High school	USA	USA			3.75	No	Yes	Mix	30.01	20	91	110	2.48	Streptococcus
Subject_324	47	No	> High school	USA	USA			4	No	No	Mix	25.91	42.3	76	89.9	1.92	Streptococcus
Subject_325	57	No	> High school	USA	USA			4	No	Yes	Mix	31.83	9.9	36	36.4	2.31	Streptococcus
Subject_326	30	Yes	> High school	USA	Mexico	20	10	3.25	No	No	Mix	24.53	124.3	67	78.3	1.88	Streptococcus
Subject_327	30	Yes	> High school	Mexico	USA	9	21	3	No	Yes	Mostly Mexican	28.09	33.9	95	118	2.44	Streptococcus
Subject_328	39	No	> High school	USA	USA			4	Yes	No	Mix	37.93	28	72	79.8	1.78	Streptococcus
Subject_329	56	Yes	< High school	Mexico	Mexico	42	14	1.25	No	No	Mostly Mexican	26.09	36.3	151	180	3.38	Fusobacterium
Subject_330	59	Yes	High school	Mexico	USA	29	30	2.75	No	No	Mix	30.64	28	116	131.4	2.82	Fusobacterium
Subject_331	39	Yes	< High school	Mexico	Mexico	36	3	1.5	No	No	Only Mexican	33.12	9.9	130	159.8	2.53	Fusobacterium
Subject_332	39	Yes	< High school	Mexico	Mexico	33	6	1.25	No	No	Only Mexican	31.58	9.9	121	165	2.92	Fusobacterium
Subject_333	29	Yes	> High school	USA	USA			3.5	Yes	No	Mix	29.44	0	159	180.1	3.51	Fusobacterium
Subject_334	64	Yes	< High school	Mexico	USA	24	40	1	No	No	Mostly Mexican	34.84	20.5	73	118.3	2.53	Streptococcus
Subject_335	37	No	< High school	Mexico	Mexico	26	11	3.5	No	Yes	Mix	29.6	16.5	65	80.3	1.89	Streptococcus
Subject_336	33	Yes	< High school	USA	USA			3	Yes	No	Mostly Mexican	17.78	0	104	124	2.34	Fusobacterium
Subject_337	48	Yes	High school	Mexico	USA	23	25	1.5	No	No	Mostly Mexican	29.61	28	112	122.5	2.65	Prevotella
Subject_338	32	Yes	< High school	Mexico	Mexico	30	2	1	No	No	Only Mexican	26	80.3	137	158	2.83	Fusobacterium
Subject_339	35	Yes	< High school	Mexico	Mexico	22	13	1.75	No	Yes	Only Mexican	28.03	9.9	79	137.5	1.74	Streptococcus
Subject_340	41	No	> High school	USA	USA			4	No	No	Mix	29.54	0	89	101.4	2.73	Streptococcus
Subject_341	23	Yes	High school	USA	USA			4	No	No	Mix	42.54	14.6	112	126.5	2.71	Fusobacterium
Subject_342	48	Yes	< High school	Mexico	USA	22	26	1.25	Yes	No	Mostly Mexican	21.52	56.3	110	120.1	2.77	Fusobacterium
Subject_343	22	Yes	< High school	Mexico	Mexico	19	3	1	No	No	Only Mexican	23.83	16.5	148	161.3	3.26	Fusobacterium
Subject_344	45	Yes	> High school	Mexico	Mexico	31	14	2	No	No	Mix	26.82	0	109	156.5	2.82	Prevotella
Subject_345	35	Yes	High school	USA	USA			3.75	No	No	Mostly Mexican	29.04	28	77	86.8	2.5	Streptococcus
Subject_346	37	Yes	High school	Mexico	USA	22	15	3.5	Yes	Yes	Mostly Mexican	32.33	56.3	96	106.6	2.25	Prevotella
Subject_347	62	No	< High school	Mexico	Mexico	37	25	2	No	No	Mostly Mexican	27.91	36.3	78	102.4	2.05	Streptococcus
Subject_348	52	Yes	> High school	Mexico	Mexico	44	8	1	No	No	Mix	30.51	4.9	86	121.1	2.52	Prevotella
Subject_349	27	Yes	< High school	Mexico	USA	0	27	1.75	No	No	Mostly Mexican	32.82	36.3	128	198.1	3.03	Prevotella
Subject_350	22	Yes	High school	Mexico	Mexico	13	9	4	Yes	No	Mostly Mexican	23.88	48.3	135	154.9	2.77	Fusobacterium
Subject_351	48	No	< High school	Mexico	USA	17	31	1.75	No	Yes	Mostly Mexican	27.3	48.3	25	32.2	1.69	Streptococcus
Subject_352	36	Yes	< High school	Mexico	Mexico	25	11	1.5	No	No	Mostly Mexican	27.6	16.5	116	211.1	2.85	Prevotella
Subject_353	42	Yes	< High school	Mexico	Mexico	35	7	2.5	No	Yes	Only Mexican	46.81	104.3	115	138.6	2.36	Fusobacterium
Subject_354	40	Yes	> High school	Mexico	Mexico	35	5	2.25	No	No	Mostly Mexican	38.32	36.3	109	127.1	2.71	Prevotella
Subject_355	24	Yes	< High school	Mexico	Mexico	18	6	2.25	No	No	Mostly Mexican	27.64	28	67	90.1	2.17	Streptococcus
Subject_356	29	No	High school	USA	USA			4	No	Yes	Mix	24.24	74.1	69	75.5	2.38	Streptococcus
Subject_357	37	Yes	< High school	Mexico	Mexico	31	6	1.25	Yes	No	Only Mexican	26.18	9.9	102	133	2.22	Fusobacterium
Subject_358	30	No	> High school	Mexico	USA	8	22	4	No	No	Mix	23.19	40	55	64.4	2.18	Streptococcus
Subject_359	31	No	> High school	USA	USA			4	No	No	Mostly Mexican	29.62	0	79	98	2.2	Streptococcus
Subject_360	33	Yes	< High school	Mexico	Mexico	25	8	1.5	No	No	Mostly Mexican	39	36.3	117	132.4	2.59	Fusobacterium
Subject_361	51	Yes	< High school	Mexico	Mexico	28	23	1	Yes	No	Mix	43.98	0	101	111.2	2.42	Streptococcus
Subject_362	31	Yes	High school	USA	Mexico	16	15	3	No	No	Mostly Mexican	21.99	48.3	60	68.3	1.67	Streptococcus
Subject_363	33	Yes	> High school	Mexico	USA	13	20	4	No	Yes	Mix	34.32	36.3	95	107.4	2.79	Prevotella
Subject_364	36	Yes	High school	Mexico	Mexico	28	8	1.75	Yes	No	Mostly Mexican	30.24	36.3	121	142	2.8	Prevotella
Subject_365	59	No	> High school	Mexico	USA	11	48	2	No	No	Mostly Mexican	21.64	120.3	144	155.7	3.26	Fusobacterium
Subject_366	31	Yes	< High school	USA	USA			3.5	No	Yes	Mostly Mexican	28.12	76.3	138	171.2	3.14	Fusobacterium
Subject_367	57	Yes	< High school	Mexico	USA	15	42	3.75	No	No	Mix	30.73	36.3	84	138.4	1.84	Streptococcus
Subject_368	43	Yes	< High school	Mexico	Mexico	30	13	1.75	No	No	Only Mexican	35.73	0	142	175.2	2.83	Fusobacterium
Subject_369	49	No	< High school	Mexico	Mexico	31	18	1.5	No	No	Mostly Mexican	38.13	36.3	75	81.1	2.31	Prevotella
